# Supplementary material for: Dual PDF Signaling Pathways Reset Clocks Via TIMELESS and Acutely Excite Target Neurons to Control Circadian Behavior
Source: PubMed Central journal article supplement (PMC3958333; doi:10.1371/journal.pbio.1001810), 2014-03-18
Supplement: pbio.1001810.s001.pdf [file pbio.1001810.s001.pdf]

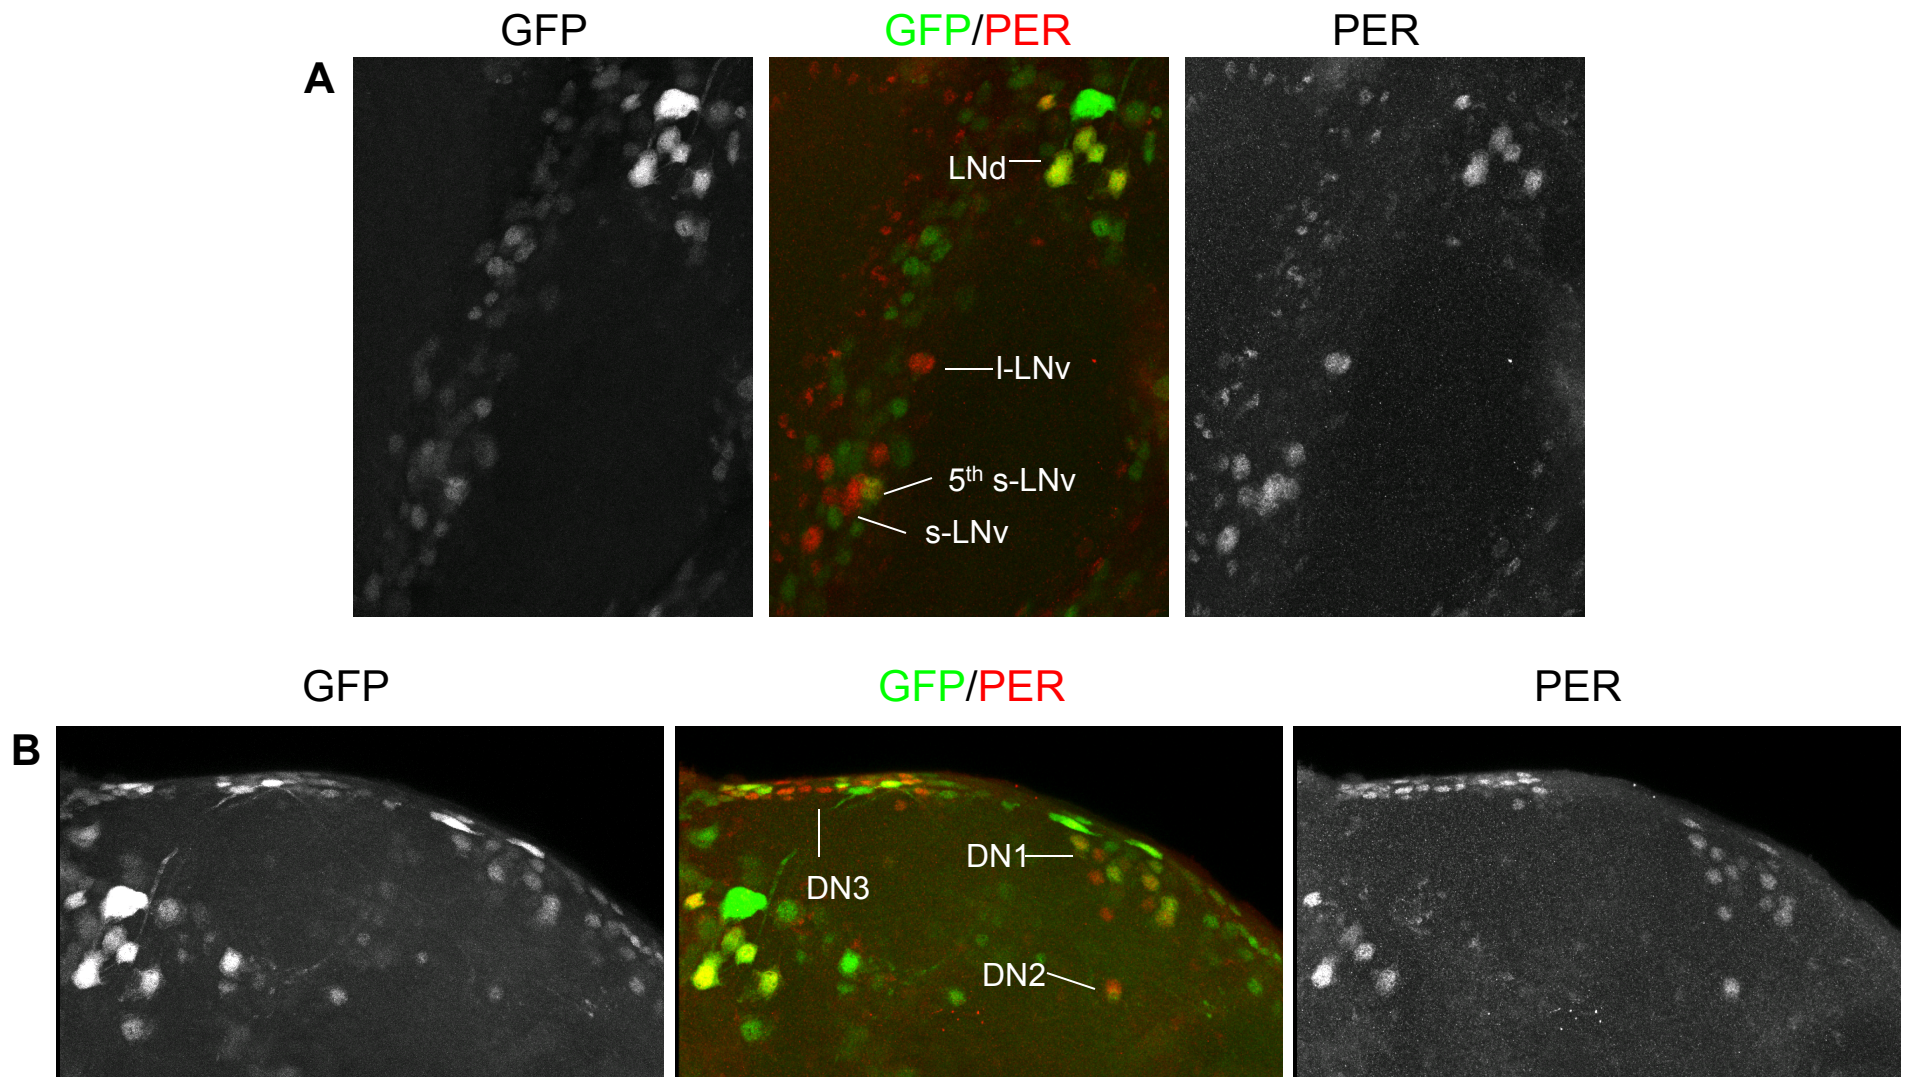

**Supplementary Figure 1: Expression pattern of *pdf-G80/+;cwo-G4/+***

A and B: Maximum projections of confocal sections taken in representative adult *pdf-G80/+;cwo-G4/U-nGFP* (green) brains labeled with anti-PER antibody (red). Sections contain either the LNs (A) or the DNs (B). LN and DN subgroups are indicated by lines.
