# Supplementary material for: Dual PDF Signaling Pathways Reset Clocks Via TIMELESS and Acutely Excite Target Neurons to Control Circadian Behavior
Source: PubMed Central journal article supplement (PMC3958333; doi:10.1371/journal.pbio.1001810), 2014-03-18
Supplement: pbio.1001810.s002.pdf [file pbio.1001810.s002.pdf]

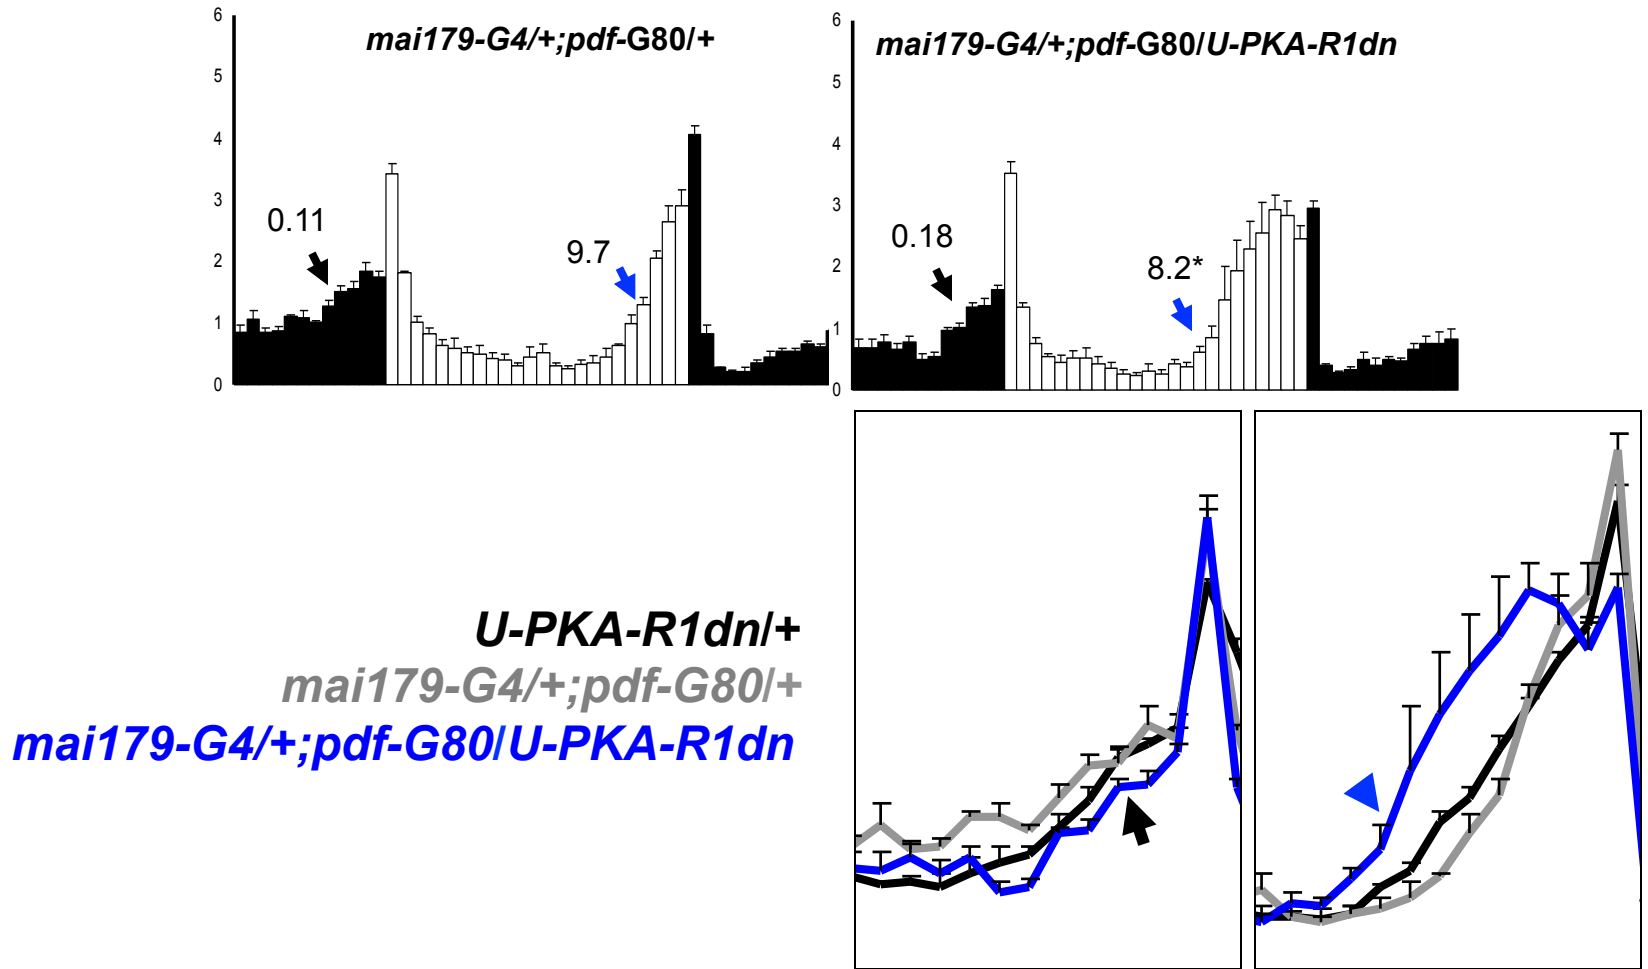

**Supplementary Figure 2: PKA-R1dn expression in CRY+ LNd and 5th sLNv phase-advances evening activity onset with no effect on morning behavior.**

Graphs, quantification and overlays are as in Figure 1.

Panel: Genotype (N)

A: *mai179-G4/+;pdf-G80/+* (31), B: *mai179-G4/+;pdf-G80/U-PKA-R1dn* (26)

\* $p < 0.05$  vs both parental controls.
