# Supplementary material for: Dual PDF Signaling Pathways Reset Clocks Via TIMELESS and Acutely Excite Target Neurons to Control Circadian Behavior
Source: PubMed Central journal article supplement (PMC3958333; doi:10.1371/journal.pbio.1001810), 2014-03-18
Supplement: pbio.1001810.s004.pdf [file pbio.1001810.s004.pdf]

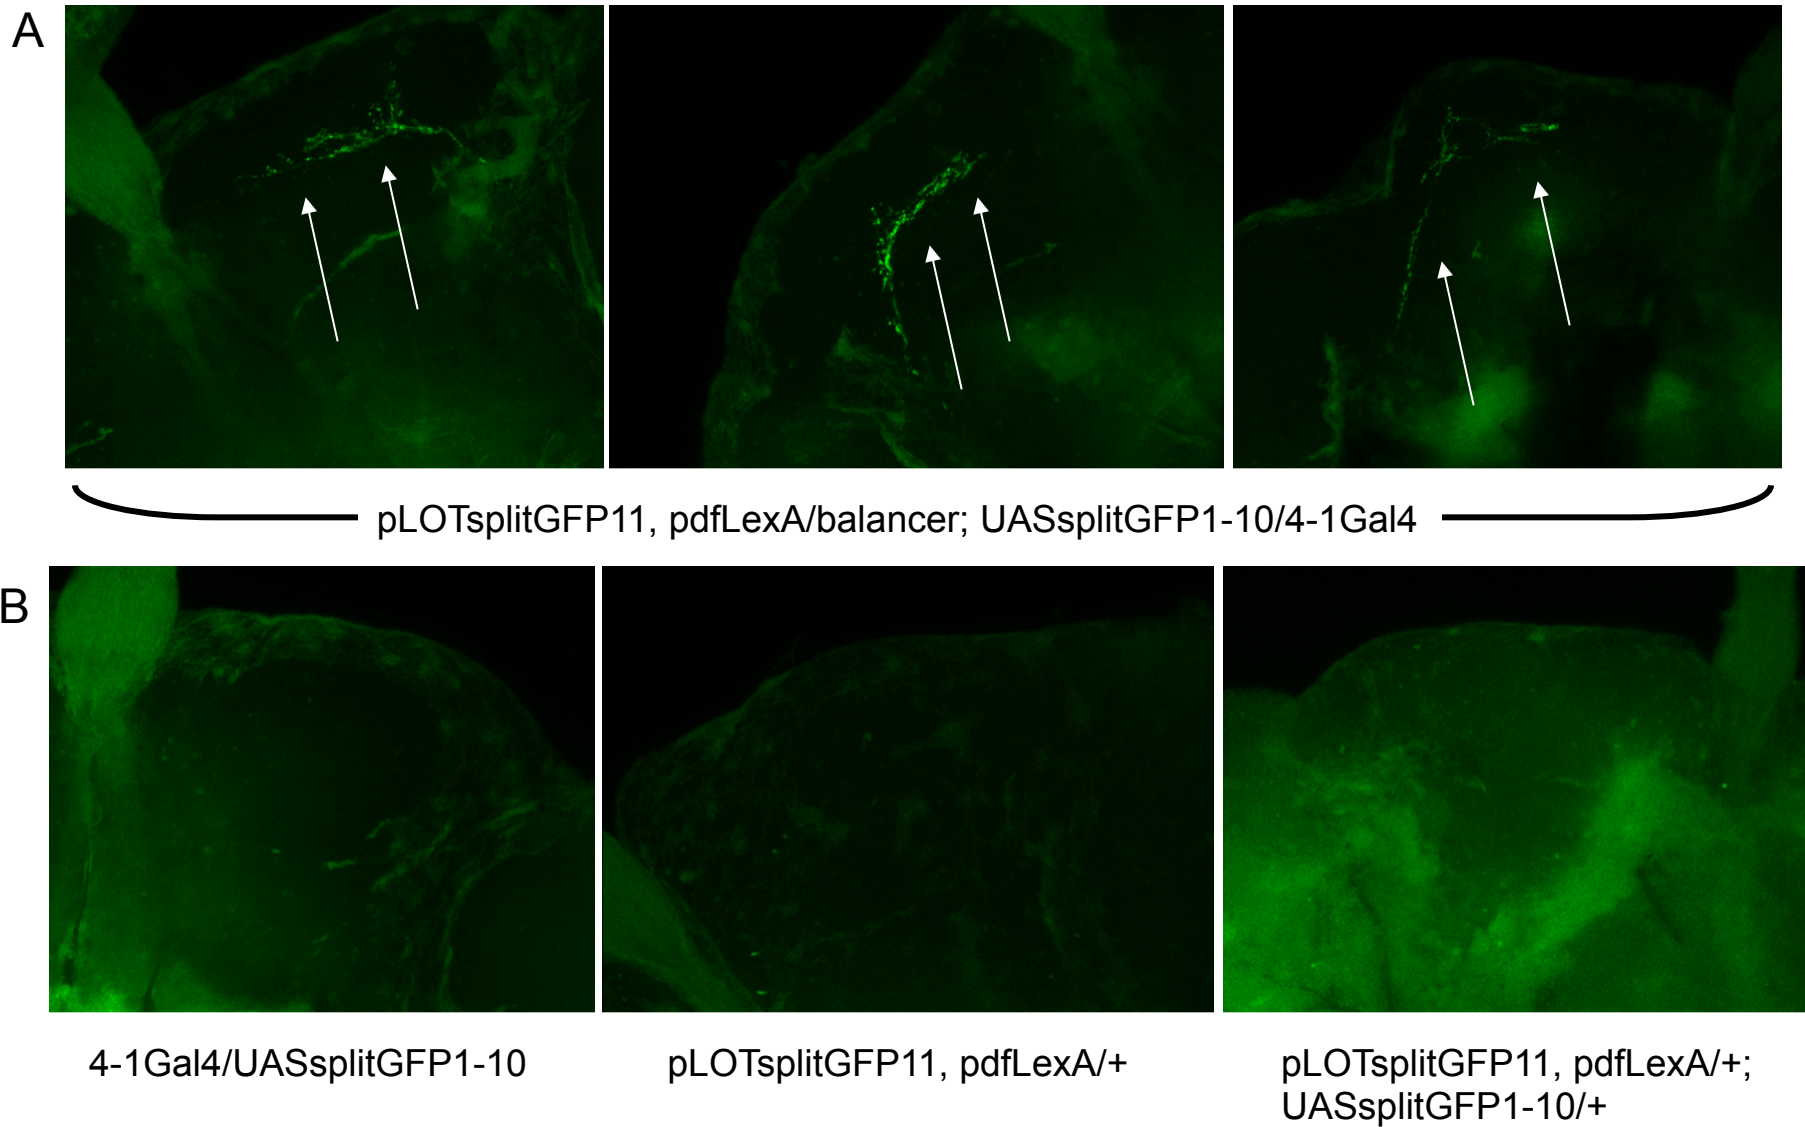

**Supplemental Figure 4. GRASP labeling is absent in parental strains.**

A: When both fragments of GFP are expressed, one using GAL4-UAS and the other with LexA-LexOp, GFP expression is detected at points of contact between cells expressing the two constructs. B: Parental lines expressing only one fragment of the GFP lack expression in the same region.
